# Supplementary material
Source: HighWire-hosted journal article supplement (https://jnm.snmjournals.org/highwire/filestream/95322/field_highwire_adjunct_files/0/213140_Supplemental_Data.pdf)
Supplement: 213140_Supplemental_Data.pdf [file 213140_Supplemental_Data.pdf]

Supplemental Table 1: Animal Groups

| Group           |                                                            | Age | Number of animals |
|-----------------|------------------------------------------------------------|-----|-------------------|
| <b>7 month</b>  | Disease progression study                                  | 7m  | n=2               |
| <b>10 month</b> | Disease progression study                                  | 10m | n=2               |
| <b>13 month</b> | Disease progression study                                  | 13m | n=2               |
| <b>16 month</b> | Disease progression study                                  | 16m | n=3               |
| <b>Baseline</b> | Treatment study, baseline group (analyzed at starting age) | 10m | n=9               |
| <b>NB-360</b>   | Treatment study, treated group (with BACE-1 inhibitor)     | 13m | n=9               |
| <b>Vehicle</b>  | Treatment study, control group (without BACE-1 inhibitor)  | 13m | n=11              |

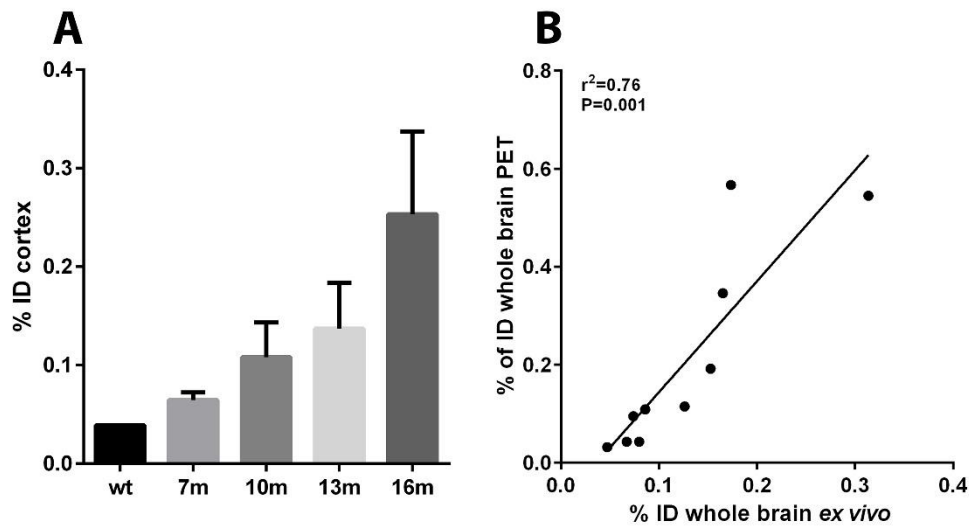

**Supplemental Figure 1. PET quantification of disease progression and comparison between PET and *ex vivo* activity.** **A.** PET image-based quantification of radioactivity, expressed as %ID per gram brain tissue, in cortex of ArcSwe animals at the age of 7, 10, 13, and 16 month in comparison with old wildtype mice. **B.** Correlation of % of injected dose between whole brain PET and *ex vivo* measurements.
